# Supplementary material
Source: publisher site journal article supplement (https://www.dovepress.com/article/573692)
Supplement: Supplementary file 1 [file 573692_supplementary%20data%20573692_1.docx]

Supplementary Table 1

A. Analysis of virulence factors in whole-genome sequencing assembly data of *C. perfringens using* the virulence factor database (VFDB). B. Analysis of drug resistance genes in whole-genome sequencing assembly data of *C.perfringens* using a comprehensive antibiotic resistance database (CARD). The thresholds for virulence and resistance genes were as follows: coverage >90% and consistency >90%, respectively.

Table 1A

| ID | GENE | %COVERAGE | %IDENTITY | ACCESSION | PRODUCT |
| --- | --- | --- | --- | --- | --- |
| 1 | *plc* | 100 | 99.25 | NP_560952 | phospholipase C |
| 2 | *pfoA* | 100 | 100 | NP_561079 | perfringolysin O |
| 3 | *colA* | 100 | 99 | NP_561089 | collagenase |
| 4 | *cloSI* | 100 | 98.29 | NP_561762 | alpha-clostripain |
| 5 | *nanH* | 100 | 96.61 | YP_695432 | sialidase |
| 6 | *nanI* | 100 | 98.42 | NP_561641 | exo-alpha-sialidase |
| 7 | *nanJ* | 99.97 | 96.99 | NP_561469 | exo-alpha-sialidase |
| 8 | *nagH* | 100 | 98.98 | NP_561107 | hyaluronidase |
| 9 | *nagI* | 100 | 98.95 | NP_561797 | hyaluronidase |
| 10 | *nagJ* | 100 | 98.94 | NP_562150 | hyaluronidase |
| 11 | *nagK* | 100 | 98.1 | NP_562195 | hyaluronidase |
| 12 | *nagL* | 100 | 99.56 | NP_562439 | hyaluronidase |

Table 1B

| ID | Best_Hit_ARO | AMR Gene Family | Best_Identities | Percentage Length of Reference Sequence | Antibiotic |
| --- | --- | --- | --- | --- | --- |
| 1 | *mprF* | defensin resistant | 98.42 | 100 | defensin |
| 2 | *tetB(P)* | tetracycline-resistant ribosomal protection protein | 97.85 | 100 | Tetracycline;  demeclocycline; oxytetracycline; |
| 3 | *cplR* | Miscellaneous ABC-F subfamily ATP-binding cassette ribosomal protection proteins | 98.36 | 96.83 | lincomycin; clindamycin; virginiamycin M1; retapamulin; |
